# Supplementary material for: Permeability and Selectivity of PPO/Graphene Composites as Mixed Matrix Membranes for CO2 Capture and Gas Separation
Source: Polymers (Basel). 2018 Jan 29;10(2):129. doi: 10.3390/polym10020129 (PMC6414883; doi:10.3390/polym10020129)
Supplement: Supplementary file 1 [file polymers-10-00129-s001.docx]

**Supplementary Information**

Permeability and selectivity of PPO/graphene composites as mixed matrix membranes for CO2 capture and gas separation.

Riccardo Rea 1, Simone Ligi 2, Meganne Christian 3, Vittorio Morandi 3,
Marco Giacinti Baschetti 1, Maria Grazia De Angelis 1,*

1 Dipartimento di Ingegneria Civile, Chimica, Ambientale e dei Materiali (DICAM), Università di Bologna, Via Terracini 28, 40131 Bologna, Italy; riccardo.rea3@unibo.it (R.R.); marco.giacinti@unibo.it (M.G.B.)

2 Graphene XT s.r.l., 40131 Bologna, Italy; [simone.ligi@graphene-xt.com](mailto:simone.ligi@graphene-xt.com)

3 CNR-IMM Section of Bologna, via Gobetti, 101-40129 Bologna, Italy; christian@bo.imm.cnr.it (M.C.); morandi@bo.imm.cnr.it (V.M.)

***** Correspondence: [grazia.deangelis@unibo.it](mailto:grazia.deangelis@unibo.it) (M.G.D.A); Tel.: +39-051-2090410

|  |
| --- |

| 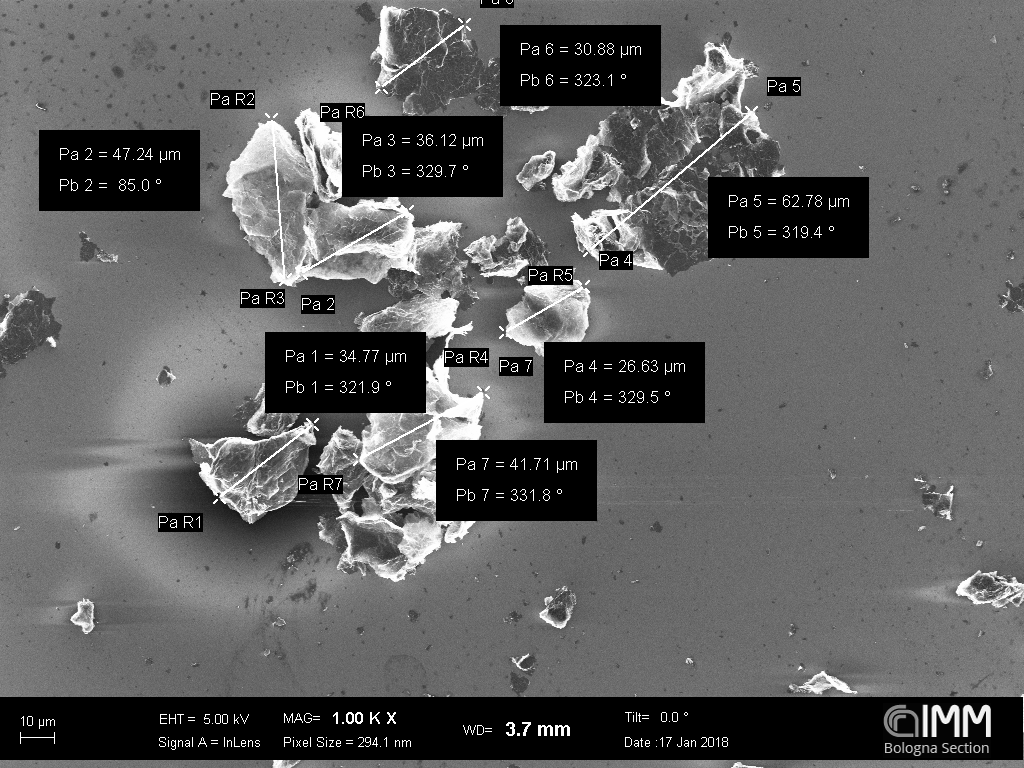 |
| --- |
|  |
| **Figure S1**: SEM images of a sample of Graphene XT 7 dispersed in water and sonicated for 10 min. |

|  |
| --- |

| **** |
| --- |
| **** |
| **Figure S2**: SEM images of a sample of Graphene XT 7 dispersed in water and sonicated for 15 h. |
